# Supplementary material for: Hemorrhagic Transformation in Acute Ischemic Stroke: A Quantitative Systematic Review
Source: MDPI journal article supplement (doi:10.3390/jcm11051162), 2022-02-22
Supplement: s1 [file s1]

**Table S1. Studies included in the review**

| <b>Author</b>                       | <b>Total sample size</b>                     | <b>Mean age for total sample</b> | <b>Male % for total sample</b> | <b>Imaging modality</b> | <b>Country</b>                      |
|-------------------------------------|----------------------------------------------|----------------------------------|--------------------------------|-------------------------|-------------------------------------|
| Larrue V, et al, 1997 [1]           | 609, ECASS 1                                 | 65                               | 55.4%                          | CT                      | 14 European countries               |
| Fiorelli M, et al, 1999 [2]         | ECASS 1                                      | Not given                        | Not given                      | CT                      | Europe, Australia, New Zealand      |
| Molina CA, et al, 2001 [3]          | 53                                           | 73.7                             | 32%                            | CT                      | Spain                               |
| Montaner J, et al, 2001 [4]         | 39                                           | 77.6 [4]                         | 50%                            | CT                      | Spain                               |
| Larrue V, et al, 2001 [5]           | ECASS 2                                      | Not given                        | Not given                      | CT                      | Europe, Australia, New Zealand      |
| Hermier M, et al, 2003 [6]          | 58                                           | 63                               | 43.1%                          | MRI                     | France                              |
| Montaner J, et al, [7]              | 41                                           | 70+/-10.6                        | 39%                            | CT                      | Spain                               |
| Montaner J, et al, 2003 [8]         | 61                                           | 71+/-9.3                         | 44.3%                          | CT                      | Spain                               |
| Celik Y, et al, 2004 [9]            | 86 Consecutive MCA pts, no antithrombotic tx | 68.1                             | 47.7%                          | CT                      | Turkey                              |
| Castellanos M, et al, 2004 [10]     | 87                                           | 67                               | 69.8%                          | CT                      | Spain                               |
| Ribo M, et al, 2004 [11]            | 77                                           | 70                               | 60%                            | CT                      | Spain                               |
| Rodriguez-Yanez M, et al, 2006 [12] | 200                                          | 72.5                             | 51.5%                          | CT                      | Spain                               |
| IMS study group, 2006 [13]          | 80                                           | Not given                        | Not given                      | CT                      | USA                                 |
| Dzialowski I, et al, 2007 [14]      | 954                                          | 67.1                             | 55%                            | CT                      | Canada                              |
| Millan M, et al, 2007 [15]          | 134                                          | 67                               | 65.7                           | CT                      | France, Spain                       |
| Thomalla G, et al, 2007 [16]        | 152                                          | 64                               | 61.2%                          | CT/MRI                  | Germany                             |
| Paciaroni M, et al, 2008 [17]       | 1125 consecutive AIS pts                     | 76                               | 55.9%                          | CT                      | Italy                               |
| Kimura K, et al, 2008 [18]          | 51                                           | 73                               | 43%                            | MRI                     | Japan                               |
| Hjort N, et al, 2008 [19]           | 33                                           | 68                               | Not given                      | MRI                     | Denmark                             |
| Mendioroz M, et al, 2009 [20]       | 119                                          | 71.8                             | 59%                            | CT                      | Spain                               |
| Aviv RI, et al, 2009 [21]           | 41                                           | 70.3+15.4                        | 63%                            | MRI                     | Canada                              |
| Butcher K, et al, 2010 [22]         | 97, EPIPHET RCT                              | 71.2+14                          | 55%                            | MRI                     | Canada, Australia, New Zealand      |
| Campbell BCV, et al, 2010 [23]      | 91, EPIPHET RCT                              | 71.4                             | 53.8%                          | MRI                     | Australia, UK, New Zealand, Belgium |

|                                         |                               |            |           |        |                           |
|-----------------------------------------|-------------------------------|------------|-----------|--------|---------------------------|
| Kim JH, et al, 2010 [24]                | 184 consecutive MCA AIS pts   | 65.7       | 53.8%     | MRI    | USA<br>S Korea            |
| Prodan CI, et al, 2010 [25]             | 115                           | 64.6       | 71%       | CT/MRI | USA                       |
| Hernandez-Guillamon M, et al, 2010 [26] | 141                           | Not given  | Not given | CT     | Spain                     |
| Sobrino T, et al, 2010 [27]             | 79                            | 66.7       | 54.4%     | CT     | Spain                     |
| Ko Y, et al, 2010 [28]                  | 786 consecutive AIS pts       | 70         | 60.6%     | CT/MRI | S Korea                   |
| Choi KH, et al, 2012 [29]               | 752 consecutive first AIS pts | 65.9       | 59.9%     | MRI    | Korea                     |
| Leira R, et al, 2012 [30]               | 161                           | 70.6       | Not given | MRI    | Spain                     |
| del Rio-Espínola A, et al, 2012 [31]    | 885                           | Not given  | 75.5%     | CT     | Spain                     |
| El-Khawas HM, et al, 2012 [32]          | 324 consecutive AIS pts.      | 60.5       | Not given | MRI    | Egypt                     |
| Costello CA, et al, 2012 [33]           | 206                           | 71         | 68.4%     | CT     | Australia                 |
| Takahashi W, et al, 2013 [34]           | 187                           | 74         | 40.1%     | CT/MRI | Japan                     |
| Jain AR, et al, 2013 [35]               | 83 consecutive AIS pts        | 72         | 55.4%     | CT/MRI | USA                       |
| Kufner A, et al, 2013 [36]              | 109                           | 71.3+-12.5 | 50%       | MRI    | Germany                   |
| Lee JG, et al, [37]                     | 770 consecutive AIS pts.      | 70.3       | 56.1%     | MRI    | Korea                     |
| Yassi N, et al, 2013 [38]               | 132                           | 74         | Not given | CT/MRI | Australia                 |
| Pereira VM, et al, 2013 [39]            | 202, STAR clinical trial      | 72         | 40%       | CT/MRI | Europe, Canada, Australia |
| Rodriguez-Gonzalez R, et al, 2013 [40]  | 129                           | 66.5       | 56.7%     | CT     | Spain                     |
| Jickling GC, et al, 2013 [41]           | 44, CLEAR trial               | 68.7       | 63.6%     | CT     | USA                       |
| Cortijo E, et al, 2014 [42]             | 69                            | 71.8       | 52%       | CT     | Spain                     |
| Hong JM, et al, 2014 [43]               | 75                            | 66.2       | 59%       | CT     | S Korea                   |
| Llombart V, et al, 2014 [44]            | 186                           | 71.5       | 53.8%     | CT     | Spain                     |
| Öcek L, et al 2015 [45]                 | 171                           | 71.2       | 55%       | CT/MRI | Turkey                    |
| d'Esterre C, et al, 2015 [46]           | 55                            | 67.3       | 41.8%     | CT     | Canada, Italy             |
| Renú A, et al, 2015 [47]                | 132 endovascular therapy      | 67         | 47.7%     | CT/MRI | Spain                     |
| Liu C, et al, 2015, [48]                | 87                            | 67.3       | 56.3%     | MRI    | China                     |
| Guo Y, et al, 2015 [49]                 | 362                           | 67.7       | 63.2%     | CT/MRI | China                     |

|                                |                          |           |           |        |                     |
|--------------------------------|--------------------------|-----------|-----------|--------|---------------------|
| Jia W, et al, 2015 [50]        | 904                      | 63.6      | 38.3%     | CT     | China               |
| Maeshima S, et al, 2016 [51]   | 165                      | Not given | 38.1%     | CT     | Japan               |
| Shi ZS, et al, 2016 [52]       | 206 endovascular therapy | 66.8      | 42.2%     | CT/MRI | Korea               |
| Bivard A, et al, 2016 [53]     | 229                      | 68        | Not given | MRI    | Australia and China |
| Cappellari M, et al, 2016 [54] | 147                      | 79        | 38%       | CT     | Italy               |
| Purrucker J, et al, 2016 [55]  | 28                       | 74        | 54%       | CT/MRI | Germany             |
| Gioia L, et al, 2016 [56]      | 66                       | 71        | 67%       | MRI    | Canada              |
| Heo J, et al, 2016 [57]        | 289 EUREKA RCT           | 64.5      | 59.9%     | MRI    | Korea               |
| Liu J, et al, 2016 [58]        | 130                      | 68.15     | 43.1%     | MRI    | China               |
| Ho BL, et al, 2016 [59]        | 241 TTT-AIS Study        | 65.8      | 60.2%     | CT     | Taiwan              |
| Guo Z, et al, 2016 [60]        | 189                      | 65        | 65%       | CT     | China               |
| Bas DF, et al, 2016 [61]       | 180                      | 63.1      | 62%       | CT     | Turkey              |
| Chen X, et al, 2017 [62]       | 316                      | 66.3      | 62.3%     | CT     | China               |
| Wei CC, et al, 2017 [63]       | 251                      | 68.5      | 39.4%     | MRI    | China               |
| Castro P, et al, 2017 [64]     | 46                       | 73        | 54%       | CT     | Portugal            |
| Purrucker JC, et al, 2017 [65] | 231                      | 77.4      | 53.2%     | CT/MRI | Germany             |

Table S2. Studies Included in Individual Analyses.

| Study Characteristics                                           | Number |
|-----------------------------------------------------------------|--------|
| Number of studies analyzing HT with CT                          | 34     |
| Number of studies analyzing HT with MRI                         | 18     |
| Number of studies analyzing HT with a combination of CT and MRI | 13     |
| Number of studies published before 2000                         | 3      |
| Number of studies published after 2000                          | 62     |
| Number of studies including data from East Asia                 | 19     |
| Number of studies including data from Europe                    | 35     |
| Number of studies including data from North America             | 11     |
| Number of studies including data from the Middle East (Egypt)   | 1      |

**Table S3. Baseline Patient Characteristics**

| Variable                                |                     | HT vs non-HT                                                                                                               | PH vs non-PH                                                                                                           | PH vs HI                                                                                                 |
|-----------------------------------------|---------------------|----------------------------------------------------------------------------------------------------------------------------|------------------------------------------------------------------------------------------------------------------------|----------------------------------------------------------------------------------------------------------|
| <b>Baseline patient characteristics</b> |                     |                                                                                                                            |                                                                                                                        |                                                                                                          |
| <b>Age<br/>HG</b>                       | W/O tPA             | 0.1 (-0.124–0.325)<br>3 studies [12, 25, 30]                                                                               | 0.121 (-0.516–0.758)<br>1 study [30]                                                                                   | 0.115 (-0.56–0.791)<br>1 study [30]                                                                      |
|                                         | With tPA            | 0.3 (-0.249–0.849)<br>4 studies [10, 18, 26, 41]                                                                           | <b>0.271</b> (0.037–0.505)<br>5 studies [20, 26, 27, 40, 59]<br>102 vs 552                                             | NG                                                                                                       |
|                                         | Total pts. included | <b>0.125</b> (0.048–0.202)<br>15 studies [1, 9, 10, 12, 18, 22, 24-<br>26, 30, 32, 37, 41, 52, 62]<br>968 vs 2512          | <b>0.215</b> (0.087–0.344)<br>10 studies [1, 20, 22, 24, 26, 27, 30, 40, 52, 60]<br>273 vs 1729                        | <b>0.267</b> (0.084–0.45)<br>5 studies [1, 22, 24, 30, 52]<br>161 vs 386                                 |
| <b>Male<br/>OR</b>                      | W/O tPA             | 1.71 (0.55–5.33)<br>3 studies [3, 12, 25]                                                                                  | 5.07 (0.48–54.02)<br>1 study [8]                                                                                       | 4.16 (0.33–50)<br>1 study [8]                                                                            |
|                                         | With tPA            | 0.89 (0.7–1.14)<br>5 studies [10, 12, 14, 25, 26]                                                                          | 1.37 (0.78–2.40)<br>7 studies [9, 13, 14, 26, 27, 40, 60]                                                              | 1.08 (1.92–0.61)<br>2 studies [14, 26]                                                                   |
|                                         | Total pts. included | 1.07 (0.88–1.31)<br>18 studies [1, 3, 10, 12, 14, 17, 18,<br>23-26, 29, 37, 41, 52, 56, 62, 64]<br>744/1282 vs 2568/4527   | <b>1.50 (1.07–2.11)</b><br>14 studies [1, 7, 9, 13, 14, 17, 23, 24, 26, 27, 29,<br>40, 52, 60]<br>281/431 vs 2395/4263 | <b>1.43 (1–2)</b><br>9 studies [1, 7, 14, 17, 23, 24, 26, 29, 52]<br>204/326 vs 352/640                  |
| <b>Chronic hypertension<br/>OR</b>      | W/O tPA             | 1.67 (0.52–5.32)<br>4 studies [3, 12, 30, 45]                                                                              | 1.74 (0.54–5.54)<br>2 studies [30, 45]                                                                                 | 2.69 (0.85–8.53)<br>3 studies [7, 30, 45]                                                                |
|                                         | With tPA            | 1.74 (0.85–3.55)<br>2 studies included [14, 26]                                                                            | <b>1.51 (1.10–2.07)</b><br>6 studies [14, 20, 26, 27, 40, 60]<br>124/194 vs 745/1414                                   | 1.54 (0.96–2.48)<br>2 studies [14, 26]<br>64/108 vs 97/199                                               |
|                                         | Total pts. included | 1.21 (0.86–1.71)<br>11 studies [1, 3, 12, 14, 17, 24, 26,<br>29, 30, 38, 45]<br>562/996 vs 2170/3485                       | <b>1.29 (1.04–1.61)</b><br>12 studies [1, 14, 17, 20, 24, 26, 27, 29, 38, 40,<br>45, 60]<br>248/392 vs 2665/4350       | 1.31 (0.87–1.96)<br>8 studies [1, 14, 17, 24, 26, 29, 30, 38]<br>192/310 vs 340/649                      |
| <b>Previous Diabetes<br/>OR</b>         | W/O tPA             | 1.41 (0.66–3.03)<br>5 studies [3, 12, 25, 30, 45]                                                                          | NG                                                                                                                     | 2.4 (0.96–6.02)<br>3 studies [7, 30, 45]                                                                 |
|                                         | With tPA            | 0.97 (0.69–1.38)<br>4 studies [14, 18, 26, 41]                                                                             | NG                                                                                                                     | 1 (0.1–9.91)<br>2 studies [14, 26]                                                                       |
|                                         | Total pts. included | 1.23 (0.97–1.56)<br>21 studies [1, 3, 9, 12, 14, 17, 18,<br>22-26, 28-30, 37, 38, 41, 45, 62, 63]<br>339/1466 vs 1318/5571 | NG                                                                                                                     | <b>1.66 (1.05–2.61)</b><br>11 studies [1, 7, 14, 17, 23, 24, 26, 29, 30,<br>38, 45]<br>83/323 vs 117/680 |
| <b>Hyperlipidemia<br/>OR</b>            | W/O tPA             | <b>0.53 (0.31–0.93)</b><br>3 studies [3, 30, 45]                                                                           | 0.81 (0.29–2.26)<br>2 studies [30, 45]                                                                                 | 1.14 (0.37–3.46)<br>3 studies [7, 30, 45]                                                                |

|                             |                     |                                                                                                                           |                                                                                                          |                                                                                                |
|-----------------------------|---------------------|---------------------------------------------------------------------------------------------------------------------------|----------------------------------------------------------------------------------------------------------|------------------------------------------------------------------------------------------------|
|                             | With tPA            | 0.52 (0.25–1.06)<br>2 studies [26, 41]                                                                                    | 1.25 (0.61–2.58)<br>5 studies [20, 26, 27, 40, 60]                                                       | 0.82 (0.18–3.73)<br>1 study [26]                                                               |
|                             | Total pts. included | 0.8 (0.62–1.03)<br>10 studies [3, 26, 28, 30, 37, 38, 41, 45, 62, 64]<br>101/452 vs 529/2167                              | 1.02 (0.57–1.84)<br>8 studies [20, 26, 27, 30, 38, 40, 45, 60]<br>56/138 vs 338/980                      | 0.76 (0.33–1.75)<br>5 studies [7, 26, 30, 38, 45]<br>9/56 vs 29/136                            |
| Alcohol Abuse<br>OR         | W/O tPA             | 1.47 (0.55–3.9)<br>1 study                                                                                                | 1.97 (0.39–10.05)<br>1 study                                                                             | 1.62 (0.28–9.56)<br>1 study                                                                    |
|                             | With tPA            | NG                                                                                                                        | NG                                                                                                       | NG                                                                                             |
|                             | Total pts. included | 1.32 (0.92–1.88)<br>4 studies [17, 29, 30, 63]<br>56/342 vs 228/1947                                                      | 1.02 (0.5–2.08)<br>3 studies [17, 29, 30]<br>10/78 vs 225/1960                                           | 1.15 (0.49–2.72)<br>3 studies [17, 29, 30]<br>10/78 vs 20/165                                  |
| Prev. anticoagulation<br>OR | W/O tPA             | NG                                                                                                                        | NG                                                                                                       | NG                                                                                             |
|                             | With tPA            | NG                                                                                                                        | NG                                                                                                       | NG                                                                                             |
|                             | Total pts. included | <b>2.47 (1.64–3.72)</b><br>4 studies [17, 32, 37, 63]<br>40/378 vs 86/2092                                                | <b>2.9 (1–8.55)</b><br>1 study [17]<br>4/36 vs 46/1089                                                   | 1.81 (0.42–7.74)<br>1 study [17]<br>4/36 vs 4/62                                               |
| Prev. Antiplatelets<br>OR   | W/O tPA             | 0.64 (0.18–2.32)<br>1 study [25]                                                                                          | NG                                                                                                       | NG                                                                                             |
|                             | With tPA            | 1.18 (0.84–1.66)<br>1 study [14]                                                                                          | <b>3.15 (1.39–7.17)</b><br>4 studies [14, 27, 40, 60]<br>61/165 vs 237/1186                              | 1.43 (0.8–2.57)<br>1 study [14]                                                                |
|                             | Total pts. included | 1.01 (0.83–1.23)<br>8 studies [1, 17, 25, 32, 37, 55, 62, 63]<br>232/937 vs 1080/3527                                     | <b>2.25 (1.26–4.02)</b><br>6 studies [1, 14, 17, 27, 40, 60]<br>85/263 vs 630/2822                       | 1.38 (0.66–2.87)<br>3 studies [1, 14, 17]<br>50/190 vs 78/414                                  |
| Prev. Statins<br>OR         | W/O tPA             | 0.36 (0.45–1.29) (25)                                                                                                     | NG                                                                                                       | NG                                                                                             |
|                             | With tPA            | NG                                                                                                                        | <b>3.58 (1.41–9.05)</b><br>2 studies [27, 40]                                                            | NG                                                                                             |
|                             | Total pts. included | 0.76 (0.45–1.29)<br>6 studies [17, 24, 25, 37, 57, 63]<br>54/440 vs 366/2294                                              | 2.15 (0.98–4.76)<br>4 studies [17, 24, 27, 40]<br>31/113 vs 146/1404                                     | 1.27 (0.2–8.15)<br>2 studies [17, 24]<br>10/68 vs 11/103                                       |
| Atrial Fibrillation<br>OR   | W/O tPA             | <b>4 (1.00–15.92)</b>                                                                                                     | 5.1 (0.69–37.86)                                                                                         | <b>4.27 (1.13–16.23)</b>                                                                       |
|                             | With tPA            | 1.98 (0.55–7.14)                                                                                                          | 1.26 (0.83–1.9)                                                                                          | 0.75 (0.41–1.38)                                                                               |
|                             | Total pts. included | <b>2.85 (1.86–4.38)</b><br>15 studies [1, 12, 14, 17, 18, 22, 23, 29, 30, 32, 38, 41, 45, 62, 64]<br>381/1039 vs 795/3943 | <b>2.25 (1.47–3.44)</b><br>12 studies [1, 14, 17, 22, 23, 27, 29, 30, 38, 45, 60]<br>146/359 vs 942/4156 | <b>2.09 (1.26–3.48)</b><br>9 studies [1, 14, 17, 22, 23, 29, 30, 38, 45]<br>118/286 vs 186/627 |
| LDL level<br>HG             | W/O tPA             | <b>-0.657 (-0.288– -1.03)</b><br>1 study [45]                                                                             | -0.089 (-0.673–0.496)<br>1 study [45]                                                                    | 0.234 (-0.442–0.909)<br>1 study [45]                                                           |
|                             | With tPA            | NG                                                                                                                        | NG                                                                                                       | NG                                                                                             |
|                             | Total pts. included | <b>-0.304 (-0.124– -0.483)</b>                                                                                            | -0.075 (-0.304–0.155)                                                                                    | 0.018 (-0.259–0.296)                                                                           |

|  |  |                                                      |                                      |                                     |
|--|--|------------------------------------------------------|--------------------------------------|-------------------------------------|
|  |  | 5 studies [17, 24, 32, 45, 63]<br><b>356 vs 1699</b> | 3 studies [17, 24, 45]<br>80 vs 1400 | 3 studies [17, 24, 45]<br>80 vs 128 |
|--|--|------------------------------------------------------|--------------------------------------|-------------------------------------|

**Table S4.** Patient data upon admission

| Variable            |                     | HT vs non-HT                                                                                                             | PH vs non-PH                                                                                      | PH vs HI                                                                            |
|---------------------|---------------------|--------------------------------------------------------------------------------------------------------------------------|---------------------------------------------------------------------------------------------------|-------------------------------------------------------------------------------------|
| <b>Systolic BP</b>  | W/O tPA             | -0.101 (-0.407–0.202)                                                                                                    | -0.445 (-1.032–0.14)                                                                              | <b>-0.759 (-0.063– -1.454)</b><br><b>1 study [45]</b><br><b>12 vs 25</b>            |
|                     | With tPA            | 0.05 (-0.188–0.285)                                                                                                      | <b>0.34 (0.11–0.569)</b><br><b>4 studies [26, 27, 40, 60]</b><br><b>89 vs 448</b>                 | NG                                                                                  |
|                     | Total pts.          | 0.043 (-0.056–0.141)<br>12 studies [3, 9, 10, 18, 22, 26, 28, 37, 41, 45, 63, 64]<br>547 vs 2035                         | <b>0.217 (-0.02–0.454)</b><br><b>6 studies [22, 26, 27, 40, 45, 60]</b><br><b>116 vs 689</b>      | -0.227 (-1.24–0.786)<br>2 studies [22, 45]<br>27 vs 57                              |
| <b>Diastolic BP</b> | W/O tPA             | -0.213 (-0.519–0.094)                                                                                                    | -0.353 (-0.94–0.232)                                                                              | -0.483 (-1.166–0.2)                                                                 |
|                     | With tPA            | 0.08 (-0.15–0.312)                                                                                                       | -0.102 (-0.445–0.24)                                                                              | NG                                                                                  |
|                     | Total pts.          | 0.031 (-0.073–0.136)<br>12 studies [3, 9, 10, 18, 22, 26, 28, 37, 41, 45, 63, 64]<br>597 vs 2034                         | -0.16 (-0.388–0.068)<br>5 studies [22, 26, 27, 40, 45]<br>88 vs 528                               | -0.37 (-0.823–0.082)<br>2 studies [22, 45]<br>27 vs 57                              |
| <b>Glucose</b>      | W/O tPA             | 0.159 (-0.201–0.52)                                                                                                      | 0.409 (-0.177–0.995)                                                                              | 0.429 (-0.251–1.11)                                                                 |
|                     | With tPA            | 0.284 (-0.048–0.617)                                                                                                     | 0.247 (-0.031–0.529)                                                                              | NG                                                                                  |
|                     | Total pts.          | <b>0.189 (0.085–0.293)</b><br><b>13 studies [3, 9, 10, 17, 18, 22, 24, 26, 28, 37, 41, 45, 63]</b><br><b>708 vs 3137</b> | <b>0.315 (0.146–0.483)</b><br><b>7 studies [17, 22, 24, 26, 27, 40, 45]</b><br><b>156 vs 1769</b> | <b>0.418 (0.163–0.673)</b><br><b>4 studies [17, 22, 24, 45]</b><br><b>95 vs 160</b> |
| <b>NIHSS</b>        | W/O tPA             | NG                                                                                                                       | NG                                                                                                | NG                                                                                  |
|                     | With tPA            | <b>0.933 (0.358–1.510)</b>                                                                                               | NG                                                                                                | NG                                                                                  |
|                     | Total pts. included | <b>0.964 (0.477–1.45)</b><br><b>6 studies [18, 23, 24, 32, 52, 62]</b><br><b>321 vs 851</b>                              | <b>0.454 (0.217–0.691)</b><br><b>3 studies [23, 24, 52]</b><br><b>84 vs 382</b>                   | <b>0.438 (0.159–0.718)</b><br><b>3 studies [23, 24, 52]</b><br><b>84 vs 124</b>     |



**Table S5. Prognostic follow-up of patients with hemorrhagic transformation**

| Variable |              | HT vs non-HT                                                       | PH vs non-PH                                                     | PH vs HI                                                         |
|----------|--------------|--------------------------------------------------------------------|------------------------------------------------------------------|------------------------------------------------------------------|
| mRS 5-6  | W/O tPA      | 1.64 (0.93–2.9)<br>1 study [5]                                     | 2 (0.3–1.02)<br>1 study [5]                                      | 1.55 (0.39–6.12)<br>1 study [5]                                  |
|          | With tPA     | 2.22 (1.7–2.92)<br>2 studies [5, 14]                               | 6.25 (3.2–12.3)<br>2 studies [5, 14]                             | 5.53 (2.28–13.40)<br>2 studies [5, 14]                           |
|          | All patients | 2.16 (1.7–2.75)<br>4 studies [1, 5, 14, 23]<br>181/646 vs 207/1192 | 5.4 (3.2–9.1)<br>4 studies [1, 5, 14, 23]<br>88/165 vs 300/1673  | 4.25 (2.22–8.14)<br>4 studies [1, 5, 14, 23]<br>88/165 vs 93/481 |
| mRS 0-1  | W/O tPA      | NG                                                                 | NG                                                               | NG                                                               |
|          | With tPA     | 0.48 (0.25–0.95)<br>2 studies [14, 16]                             | 0.35 (0.10–1.28)<br>2 studies [14, 16]                           | 0.5 (0.22–1.15)<br>2 studies [14, 16]                            |
|          | All patients | 0.45 (0.28–0.71)<br>3 studies [14, 16, 23]<br>92/378 vs 342/819    | 0.35 (0.15–0.86)<br>3 studies [14, 16, 23]<br>18/120 vs 416/1077 | 0.5 (0.27–0.9)<br>3 studies [14, 16, 23]<br>18/120 vs 74/258     |

1. Larrue, V.; von Kummer, R.; del Zoppo, G.; Bluhmki, E., Hemorrhagic transformation in acute ischemic stroke. Potential contributing factors in the European Cooperative Acute Stroke Study. *Stroke* **1997**, 28 (5), 957-960.
2. Fiorelli, M.; Bastianello, S.; von Kummer, R.; del Zoppo, G. J.; Larrue, V.; Lesaffre, E.; Ringleb, A. P.; Lorenzano, S.; Manelfe, C.; Bozzao, L., Hemorrhagic transformation within 36 hours of a cerebral infarct: relationships with early clinical deterioration and 3-month outcome in the European Cooperative Acute Stroke Study I (ECASS I) cohort. *Stroke* **1999**, 30 (11), 2280-2284.
3. Molina, C. A.; Montaner, J.; Abilleira, S.; Ibarra, B.; Romero, F.; Arenillas, J. F.; Alvarez-Sabín, J., Timing of spontaneous recanalization and risk of hemorrhagic transformation in acute cardioembolic stroke. *Stroke* **2001**, 32 (5), 1079-1084.
4. Montaner, J.; Alvarez-Sabín, J.; Molina, C. A.; Anglés, A.; Abilleira, S.; Arenillas, J.; Monasterio, J., Matrix metalloproteinase expression is related to hemorrhagic transformation after cardioembolic stroke. *Stroke* **2001**, 32 (12), 2762-2767.
5. Larrue, V.; von Kummer, R. R.; Müller, A.; Bluhmki, E., Risk factors for severe hemorrhagic transformation in ischemic stroke patients treated with recombinant tissue plasminogen activator: a secondary analysis of the European-Australasian Acute Stroke Study (ECASS II). *Stroke* **2001**, 32 (2), 438-441.

6. Hermier, M.; Nighoghossian, N.; Derex, L.; Adeleine, P.; Wiart, M.; Berthezène, Y.; Cotton, F.; Pialat, J. B.; Dardel, P.; Honnorat, J.; Trouillas, P.; Froment, J. C., Hypointense transcerebral veins at T2\*-weighted MRI: a marker of hemorrhagic transformation risk in patients treated with intravenous tissue plasminogen activator. *J Cereb Blood Flow Metab* **2003**, 23 (11), 1362-1370.
7. Montaner, J.; Molina, C. A.; Monasterio, J.; Abilleira, S.; Arenillas, J. F.; Ribó, M.; Quintana, M.; Alvarez-Sabín, J., Matrix metalloproteinase-9 pretreatment level predicts intracranial hemorrhagic complications after thrombolysis in human stroke. *Circulation* **2003**, 107 (4), 598-603.
8. Montaner, J.; Fernández-Cadenas, I.; Molina, C. A.; Monasterio, J.; Arenillas, J. F.; Ribó, M.; Quintana, M.; Chacón, P.; Andreu, A. L.; Alvarez-Sabín, J., Safety profile of tissue plasminogen activator treatment among stroke patients carrying a common polymorphism (C-1562T) in the promoter region of the matrix metalloproteinase-9 gene. *Stroke* **2003**, 34 (12), 2851-2855.
9. Celik, Y.; Utku, U.; Asil, T.; Balci, K., Factors affecting haemorrhagic transformation in middle cerebral artery infarctions. *J Clin Neurosci* **2004**, 11 (6), 656-658.
10. Castellanos, M.; Leira, R.; Serena, J.; Blanco, M.; Pedraza, S.; Castillo, J.; Dávalos, A., Plasma cellular-fibronectin concentration predicts hemorrhagic transformation after thrombolytic therapy in acute ischemic stroke. *Stroke* **2004**, 35 (7), 1671-1676.
11. Ribo, M.; Montaner, J.; Molina, C. A.; Arenillas, J. F.; Santamarina, E.; Quintana, M.; Alvarez-Sabín, J., Admission fibrinolytic profile is associated with symptomatic hemorrhagic transformation in stroke patients treated with tissue plasminogen activator. *Stroke* **2004**, 35 (9), 2123-2127.
12. Rodríguez-Yáñez, M.; Castellanos, M.; Blanco, M.; Millán, M.; Nombela, F.; Sobrino, T.; Lizasoain, I.; Leira, R.; Serena, J.; Dávalos, A.; Castillo, J., Micro- and macroalbuminuria predict hemorrhagic transformation in acute ischemic stroke. *Neurology* **2006**, 67 (7), 1172-1177.
13. Hemorrhage in the interventional management of stroke study. *Stroke* **2006**, 37 (3), 847-851.
14. Dzialowski, I.; Pexman, J. H.; Barber, P. A.; Demchuk, A. M.; Buchan, A. M.; Hill, M. D., Asymptomatic hemorrhage after thrombolysis may not be benign: prognosis by hemorrhage type in the Canadian alteplase for stroke effectiveness study registry. *Stroke* **2007**, 38 (1), 75-79.
15. Millan, M.; Sobrino, T.; Castellanos, M.; Nombela, F.; Arenillas, J. F.; Riva, E.; Cristobo, I.; García, M. M.; Vivancos, J.; Serena, J.; Moro, M. A.; Castillo, J.; Dávalos, A., Increased body iron stores are associated with poor outcome after thrombolytic treatment in acute stroke. *Stroke* **2007**, 38 (1), 90-95.

16. Thomalla, G.; Sobesky, J.; Köhrmann, M.; Fiebach, J. B.; Fiehler, J.; Zaro Weber, O.; Kruetzelmann, A.; Kucinski, T.; Rosenkranz, M.; Röther, J.; Schellinger, P. D., Two tales: hemorrhagic transformation but not parenchymal hemorrhage after thrombolysis is related to severity and duration of ischemia: MRI study of acute stroke patients treated with intravenous tissue plasminogen activator within 6 hours. *Stroke* **2007**, *38* (2), 313-318.
17. Paciaroni, M.; Agnelli, G.; Corea, F.; Ageno, W.; Alberti, A.; Lanari, A.; Caso, V.; Micheli, S.; Bertolani, L.; Venti, M.; Palmerini, F.; Biagini, S.; Comi, G.; Previdi, P.; Silvestrelli, G., Early hemorrhagic transformation of brain infarction: rate, predictive factors, and influence on clinical outcome: results of a prospective multicenter study. *Stroke* **2008**, *39* (8), 2249-2256.
18. Kimura, K.; Iguchi, Y.; Shibazaki, K.; Aoki, J.; Terasawa, Y., Hemorrhagic transformation of ischemic brain tissue after t-PA thrombolysis as detected by MRI may be asymptomatic, but impair neurological recovery. *J Neurol Sci* **2008**, *272* (1-2), 136-142.
19. Hjort, N.; Wu, O.; Ashkanian, M.; Sølling, C.; Mouridsen, K.; Christensen, S.; Gyldensted, C.; Andersen, G.; Østergaard, L., MRI detection of early blood-brain barrier disruption: parenchymal enhancement predicts focal hemorrhagic transformation after thrombolysis. *Stroke* **2008**, *39* (3), 1025-1028.
20. Mendioroz, M.; Fernández-Cadenas, I.; Alvarez-Sabín, J.; Rosell, A.; Quiroga, D.; Cuadrado, E.; Delgado, P.; Rubiera, M.; Ribó, M.; Molina, C.; Montaner, J., Endogenous activated protein C predicts hemorrhagic transformation and mortality after tissue plasminogen activator treatment in stroke patients. *Cerebrovasc Dis* **2009**, *28* (2), 143-150.
21. Aviv, R. I.; d'Esterre, C. D.; Murphy, B. D.; Hopyan, J. J.; Buck, B.; Mallia, G.; Li, V.; Zhang, L.; Symons, S. P.; Lee, T. Y., Hemorrhagic transformation of ischemic stroke: prediction with CT perfusion. *Radiology* **2009**, *250* (3), 867-877.
22. Butcher, K.; Christensen, S.; Parsons, M.; De Silva, D. A.; Ebinger, M.; Levi, C.; Jeerakathil, T.; Campbell, B. C.; Barber, P. A.; Bladin, C.; Fink, J.; Tress, B.; Donnan, G. A.; Davis, S. M., Postthrombolysis blood pressure elevation is associated with hemorrhagic transformation. *Stroke* **2010**, *41* (1), 72-77.
23. Campbell, B. C.; Christensen, S.; Butcher, K. S.; Gordon, I.; Parsons, M. W.; Desmond, P. M.; Barber, P. A.; Levi, C. R.; Bladin, C. F.; De Silva, D. A.; Donnan, G. A.; Davis, S. M., Regional very low cerebral blood volume predicts hemorrhagic transformation better than diffusion-weighted imaging volume and thresholded apparent diffusion coefficient in acute ischemic stroke. *Stroke* **2010**, *41* (1), 82-88.
24. Kim, J. H.; Bang, O. Y.; Liebeskind, D. S.; Ovbiagele, B.; Kim, G. M.; Chung, C. S.; Lee, K. H.; Saver, J. L., Impact of baseline tissue status (diffusion-weighted imaging lesion) versus perfusion status (severity of hypoperfusion) on hemorrhagic transformation. *Stroke* **2010**, *41* (3), e135-142.

25. Prodan, C. I.; Stoner, J. A.; Cowan, L. D.; Dale, G. L., Lower coated-platelet levels are associated with early hemorrhagic transformation in patients with non-lacunar brain infarction. *J Thromb Haemost* **2010**, 8 (6), 1185-1190.
26. Hernandez-Guillamon, M.; Garcia-Bonilla, L.; Solé, M.; Sosti, V.; Parés, M.; Campos, M.; Ortega-Aznar, A.; Domínguez, C.; Rubiera, M.; Ribó, M.; Quintana, M.; Molina, C. A.; Alvarez-Sabín, J.; Rosell, A.; Unzeta, M.; Montaner, J., Plasma VAP-1/SSAO activity predicts intracranial hemorrhages and adverse neurological outcome after tissue plasminogen activator treatment in stroke. *Stroke* **2010**, 41 (7), 1528-1535.
27. Sobrino, T.; Millán, M.; Castellanos, M.; Blanco, M.; Brea, D.; Dorado, L.; Rodríguez-González, R.; Rodríguez-Yáñez, M.; Serena, J.; Leira, R.; Dávalos, A.; Castillo, J., Association of growth factors with arterial recanalization and clinical outcome in patients with ischemic stroke treated with tPA. *J Thromb Haemost* **2010**, 8 (7), 1567-1574.
28. Ko, Y.; Park, J. H.; Yang, M. H.; Ko, S. B.; Han, M. K.; Oh, C. W.; Lee, J.; Lee, J.; Bae, H. J., The significance of blood pressure variability for the development of hemorrhagic transformation in acute ischemic stroke. *Stroke* **2010**, 41 (11), 2512-2518.
29. Choi, K. H.; Park, M. S.; Kim, J. T.; Nam, T. S.; Choi, S. M.; Kim, B. C.; Kim, M. K.; Cho, K. H., The serum ferritin level is an important predictor of hemorrhagic transformation in acute ischaemic stroke. *Eur J Neurol* **2012**, 19 (4), 570-577.
30. Leira, R.; Sobrino, T.; Blanco, M.; Campos, F.; Rodríguez-Yáñez, M.; Castellanos, M.; Moldes, O.; Millán, M.; Dávalos, A.; Castillo, J., A higher body temperature is associated with haemorrhagic transformation in patients with acute stroke untreated with recombinant tissue-type plasminogen activator (rtPA). *Clin Sci (Lond)* **2012**, 122 (3), 113-119.
31. del Río-Espínola, A.; Fernández-Cadenas, I.; Giralt, D.; Quiroga, A.; Gutiérrez-Agulló, M.; Quintana, M.; Fernández-Álvarez, P.; Domingues-Montanari, S.; Mendióroz, M.; Delgado, P.; Turck, N.; Ruíz, A.; Ribó, M.; Castellanos, M.; Obach, V.; Martínez, S.; Freijo, M. M.; Jiménez-Conde, J.; Cuadrado-Godia, E.; Roquer, J.; Chacón, P.; Martí-Fàbregas, J.; Sánchez, J. C.; Montaner, J., A predictive clinical-genetic model of tissue plasminogen activator response in acute ischemic stroke. *Ann Neurol* **2012**, 72 (5), 716-729.
32. El-Khawas, H. M.; El-Rakawy, M. H.; Zakaria, M. F.; Tantawy, W. H.; Raafat, M. A.; Fouad, M. M., Predictive factors of hemorrhagic transformation in acute ischemic stroke. *Egyptian Journal of Neurology, Psychiatry & Neurosurgery* **2012**, 49 (3).
33. Costello, C. A.; Campbell, B. C.; Perez de la Ossa, N.; Zheng, T. H.; Sherwin, J. C.; Weir, L.; Hand, P.; Yan, B.; Desmond, P. M.; Davis, S. M., Age over 80 years is not associated with increased hemorrhagic transformation after stroke thrombolysis. *J Clin Neurosci* **2012**, 19 (3), 360-363.

34. Takahashi, W.; Moriya, Y.; Mizuma, A.; Uesugi, T.; Ohnuki, Y.; Takizawa, S., Cerebral microbleeds on T2\*-weighted images and hemorrhagic transformation after antithrombotic therapies for ischemic stroke. *J Stroke Cerebrovasc Dis* **2013**, *22* (8), e528-532.
35. Jain, A. R.; Jain, M.; Kanthala, A. R.; Damania, D.; Stead, L. G.; Wang, H. Z.; Jahromi, B. S., Association of CT perfusion parameters with hemorrhagic transformation in acute ischemic stroke. *AJNR Am J Neuroradiol* **2013**, *34* (10), 1895-1900.
36. Kufner, A.; Galinovic, I.; Brunecker, P.; Cheng, B.; Thomalla, G.; Gerloff, C.; Campbell, B. C.; Nolte, C. H.; Endres, M.; Fiebach, J. B.; Ebinger, M., Early infarct FLAIR hyperintensity is associated with increased hemorrhagic transformation after thrombolysis. *Eur J Neurol* **2013**, *20* (2), 281-285.
37. Lee, J. G.; Lee, K. B.; Jang, I. M.; Roh, H.; Ahn, M. Y.; Woo, H. Y.; Hwang, H. W., Low glomerular filtration rate increases hemorrhagic transformation in acute ischemic stroke. *Cerebrovasc Dis* **2013**, *35* (1), 53-59.
38. Yassi, N.; Parsons, M. W.; Christensen, S.; Sharma, G.; Bivard, A.; Donnan, G. A.; Levi, C. R.; Desmond, P. M.; Davis, S. M.; Campbell, B. C., Prediction of poststroke hemorrhagic transformation using computed tomography perfusion. *Stroke* **2013**, *44* (11), 3039-3043.
39. Pereira, V. M.; Gralla, J.; Davalos, A.; Bonafé, A.; Castaño, C.; Chapot, R.; Liebeskind, D. S.; Nogueira, R. G.; Arnold, M.; Sztajzel, R.; Liebig, T.; Goyal, M.; Besselmann, M.; Moreno, A.; Moreno, A.; Schroth, G., Prospective, multicenter, single-arm study of mechanical thrombectomy using Solitaire Flow Restoration in acute ischemic stroke. *Stroke* **2013**, *44* (10), 2802-2807.
40. Rodríguez-González, R.; Blanco, M.; Rodríguez-Yáñez, M.; Moldes, O.; Castillo, J.; Sobrino, T., Platelet derived growth factor-CC isoform is associated with hemorrhagic transformation in ischemic stroke patients treated with tissue plasminogen activator. *Atherosclerosis* **2013**, *226* (1), 165-171.
41. Jickling, G. C.; Ander, B. P.; Stamova, B.; Zhan, X.; Liu, D.; Rothstein, L.; Verro, P.; Khoury, J.; Jauch, E. C.; Pancioli, A. M.; Broderick, J. P.; Sharp, F. R., RNA in blood is altered prior to hemorrhagic transformation in ischemic stroke. *Ann Neurol* **2013**, *74* (2), 232-240.
42. Cortijo, E.; García-Bermejo, P.; Calleja, A. I.; Pérez-Fernández, S.; Gómez, R.; del Monte, J. M.; Reyes, J.; Arenillas, J. F., Intravenous thrombolysis in ischemic stroke with unknown onset using CT perfusion. *Acta Neurol Scand* **2014**, *129* (3), 178-183.
43. Hong, J. M.; Lee, J. S.; Song, H. J.; Jeong, H. S.; Choi, H. A.; Lee, K., Therapeutic hypothermia after recanalization in patients with acute ischemic stroke. *Stroke* **2014**, *45* (1), 134-140.
44. Llobart, V.; Dominguez, C.; Bustamante, A.; Rodriguez-Sureda, V.; Martín-Gallán, P.; Vilches, A.; García-Berrocso, T.; Penalba, A.; Hernández-Guillamon, M.; Rubiera, M.; Ribó, M.; Eschenfelder, C.; Giral, D.; Molina, C. A.; Alvarez-Sabín, J.; Rosell, A.; Montaner, J.,

- Fluorescent molecular peroxidation products: a prognostic biomarker of early neurologic deterioration after thrombolysis. *Stroke* **2014**, 45 (2), 432-437.
45. Öcek, L.; Güner, D.; Uludağ İ, F.; Tiftikçioğlu, B.; Zorlu, Y., Risk factors for hemorrhagic transformation in patients with acute middle cerebral artery infarction. *Noro Psikiyatr Ars* **2015**, 52 (4), 342-345.
46. d'Esterre, C. D.; Roversi, G.; Padroni, M.; Bernardoni, A.; Tamborino, C.; De Vito, A.; Azzini, C.; Marcello, O.; Saletti, A.; Ceruti, S.; Lee, T. Y.; Fainardi, E., CT perfusion cerebral blood volume does not always predict infarct core in acute ischemic stroke. *Neurol Sci* **2015**, 36 (10), 1777-1783.
47. Renú, A.; Amaro, S.; Laredo, C.; Román, L. S.; Llull, L.; Lopez, A.; Urrea, X.; Blasco, J.; Oleaga, L.; Chamorro, Á., Relevance of blood-brain barrier disruption after endovascular treatment of ischemic stroke: dual-energy computed tomographic study. *Stroke* **2015**, 46 (3), 673-679.
48. Liu, C.; Dong, Z.; Xu, L.; Khursheed, A.; Dong, L.; Liu, Z.; Yang, J.; Liu, J., MR image features predicting hemorrhagic transformation in acute cerebral infarction: a multimodal study. *Neuroradiology* **2015**, 57 (11), 1145-1152.
49. Guo, Y.; Yan, S.; Zhang, S.; Zhang, X.; Chen, Q.; Liu, K.; Liebeskind, D. S.; Lou, M., Lower serum calcium level is associated with hemorrhagic transformation after thrombolysis. *Stroke* **2015**, 46 (5), 1359-1361.
50. Jia, W.; Liao, X.; Pan, Y.; Wang, Y.; Cui, T.; Zhou, L.; Wang, Y., Thrombolytic-related asymptomatic hemorrhagic transformation does not deteriorate clinical outcome: data from TIMS in China. *PLoS One* **2015**, 10 (11), e0142381.
51. Maeshima, S.; Okamoto, S.; Okazaki, H.; Mizuno, S.; Asano, N.; Tsunoda, T.; Maeda, H.; Masaki, M.; Sonoda, S., Hemorrhagic transformation in patients with cerebral infarction referred to a rehabilitation hospital. *Interv Neurol* **2016**, 4 (3-4), 69-74.
52. Shi, Z. S.; Duckwiler, G. R.; Jahan, R.; Tateshima, S.; Gonzalez, N. R.; Szeder, V.; Saver, J. L.; Kim, D.; Ali, L. K.; Starkman, S.; Vespa, P. M.; Salamon, N.; Villablanca, J. P.; Viñuela, F.; Feng, L.; Loh, Y.; Liebeskind, D. S., Mechanical thrombectomy for acute ischemic stroke with cerebral microbleeds. *J Neurointerv Surg* **2016**, 8 (6), 563-567.
53. Bivard, A.; Cheng, X.; Lin, L. T.; Levi, C.; Spratt, N.; Kleinig, T.; O'Brien, B.; Butcher, K.; Lou, M.; Zhang, J. F.; Sylaja, P. N.; Cao, W. J.; Jannes, J.; Dong, Q.; Parsons, M., Global white matter hypoperfusion on CT predicts larger infarcts and hemorrhagic transformation after acute ischemia. *CNS Neurosci Ther* **2016**, 22 (3), 238-243.

54. Cappellari, M.; Carletti, M.; Danese, A.; Bovi, P., Early introduction of direct oral anticoagulants in cardioembolic stroke patients with non-valvular atrial fibrillation. *J Thromb Thrombolysis* **2016**, *42* (3), 393-398.
55. Purruicker, J. C.; Wolf, M.; Haas, K.; Rizos, T.; Khan, S.; Dziewas, R.; Kleinschnitz, C.; Binder, A.; Gröschel, K.; Hennerici, M. G.; Lobotesis, K.; Poli, S.; Seidel, G.; Neumann-Haefelin, T.; Ringleb, P. A.; Heuschmann, P. U.; Veltkamp, R., Safety of endovascular thrombectomy in patients receiving non-nitamin K antagonist oral anticoagulants. *Stroke* **2016**, *47* (4), 1127-1130.
56. Gioia, L. C.; Kate, M.; Sivakumar, L.; Hussain, D.; Kalashyan, H.; Buck, B.; Bussiere, M.; Jeerakathil, T.; Shuaib, A.; Emery, D.; Butcher, K., Early rivaroxaban use after cardioembolic stroke may not result in hemorrhagic transformation: a prospective magnetic resonance imaging study. *Stroke* **2016**, *47* (7), 1917-1919.
57. Heo, J. H.; Song, D.; Nam, H. S.; Kim, E. Y.; Kim, Y. D.; Lee, K. Y.; Lee, K. J.; Yoo, J.; Kim, Y. N.; Lee, B. C.; Yoon, B. W.; Kim, J. S., Effect and safety of rosuvastatin in acute ischemic stroke. *J Stroke* **2016**, *18* (1), 87-95.
58. Liu, J.; Wang, D.; Li, J.; Xiong, Y.; Liu, B.; Wei, C.; Wu, S.; Lin, J.; Liu, M., Increased serum alkaline phosphatase as a predictor of symptomatic hemorrhagic transformation in ischemic stroke patients with atrial fibrillation and/or rheumatic heart disease. *J Stroke Cerebrovasc Dis* **2016**, *25* (10), 2448-2452.
59. Ho, B. L.; Chen, C. F.; Lin, R. T.; Liu, C. K.; Chao, A. C., Clinical implication of hemorrhagic transformation in ischemic stroke patients treated with recombinant tissue plasminogen activator. *Neurol Sci* **2016**, *37* (11), 1799-1805.
60. Guo, Z.; Yu, S.; Xiao, L.; Chen, X.; Ye, R.; Zheng, P.; Dai, Q.; Sun, W.; Zhou, C.; Wang, S.; Zhu, W.; Liu, X., Dynamic change of neutrophil to lymphocyte ratio and hemorrhagic transformation after thrombolysis in stroke. *J Neuroinflammation* **2016**, *13* (1), 199.
61. Bas, D. F.; Ozdemir, A. O.; Colak, E.; Kebapci, N., Higher insulin resistance level is associated with worse clinical response in acute ischemic stroke patients treated with intravenous thrombolysis. *Transl Stroke Res* **2016**, *7* (3), 167-171.
62. Chen, X.; Wang, Y.; Fu, M.; Lei, H.; Cheng, Q.; Zhang, X., Plasma immunoproteasome predicts early hemorrhagic transformation in acute ischemic stroke patients. *J Stroke Cerebrovasc Dis* **2017**, *26* (1), 49-56.
63. Wei, C. C.; Zhang, S. T.; Wang, Y. H.; Liu, J. F.; Li, J.; Yuan, R. Z.; Tan, G.; Zhang, S. H.; Liu, M., Association between leukoaraiosis and hemorrhagic transformation after cardioembolic stroke due to atrial fibrillation and/or rheumatic heart disease. *J Neurol Sci* **2017**, *378*, 94-99.

64. Castro, P.; Azevedo, E.; Serrador, J.; Rocha, I.; Sorond, F., Hemorrhagic transformation and cerebral edema in acute ischemic stroke: Link to cerebral autoregulation. *J Neurol Sci* **2017**, *372*, 256-261.
65. Purruicker, J. C.; Haas, K.; Wolf, M.; Rizos, T.; Khan, S.; Kraft, P.; Poli, S.; Dziewas, R.; Meyne, J.; Palm, F.; Jander, S.; Möhlenbruch, M.; Heuschmann, P. U.; Veltkamp, R., Haemorrhagic transformation after ischaemic stroke in patients taking non-vitamin K antagonist oral anticoagulants. *J Stroke* **2017**, *19* (1), 67-76.
